# Supplementary material for: Survival outcomes and clinical benefit in patients with acute myeloid leukemia treated with glasdegib and low-dose cytarabine according to response to therapy
Source: PubMed Central journal article supplement (PMC7362563; doi:10.1186/s13045-020-00929-8), 2020-07-14

**Fig. S1.** Duration of treatment with best overall response. **a** For patients receiving glasdegib + LDAC. **b** For patients receiving LDAC alone. Abbreviations: CR, complete remission; CRi, CR with incomplete hematologic response; EOT, end of treatment; LDAC, low-dose cytarabine; MR, minor response; PR, partial response; SD, stable disease

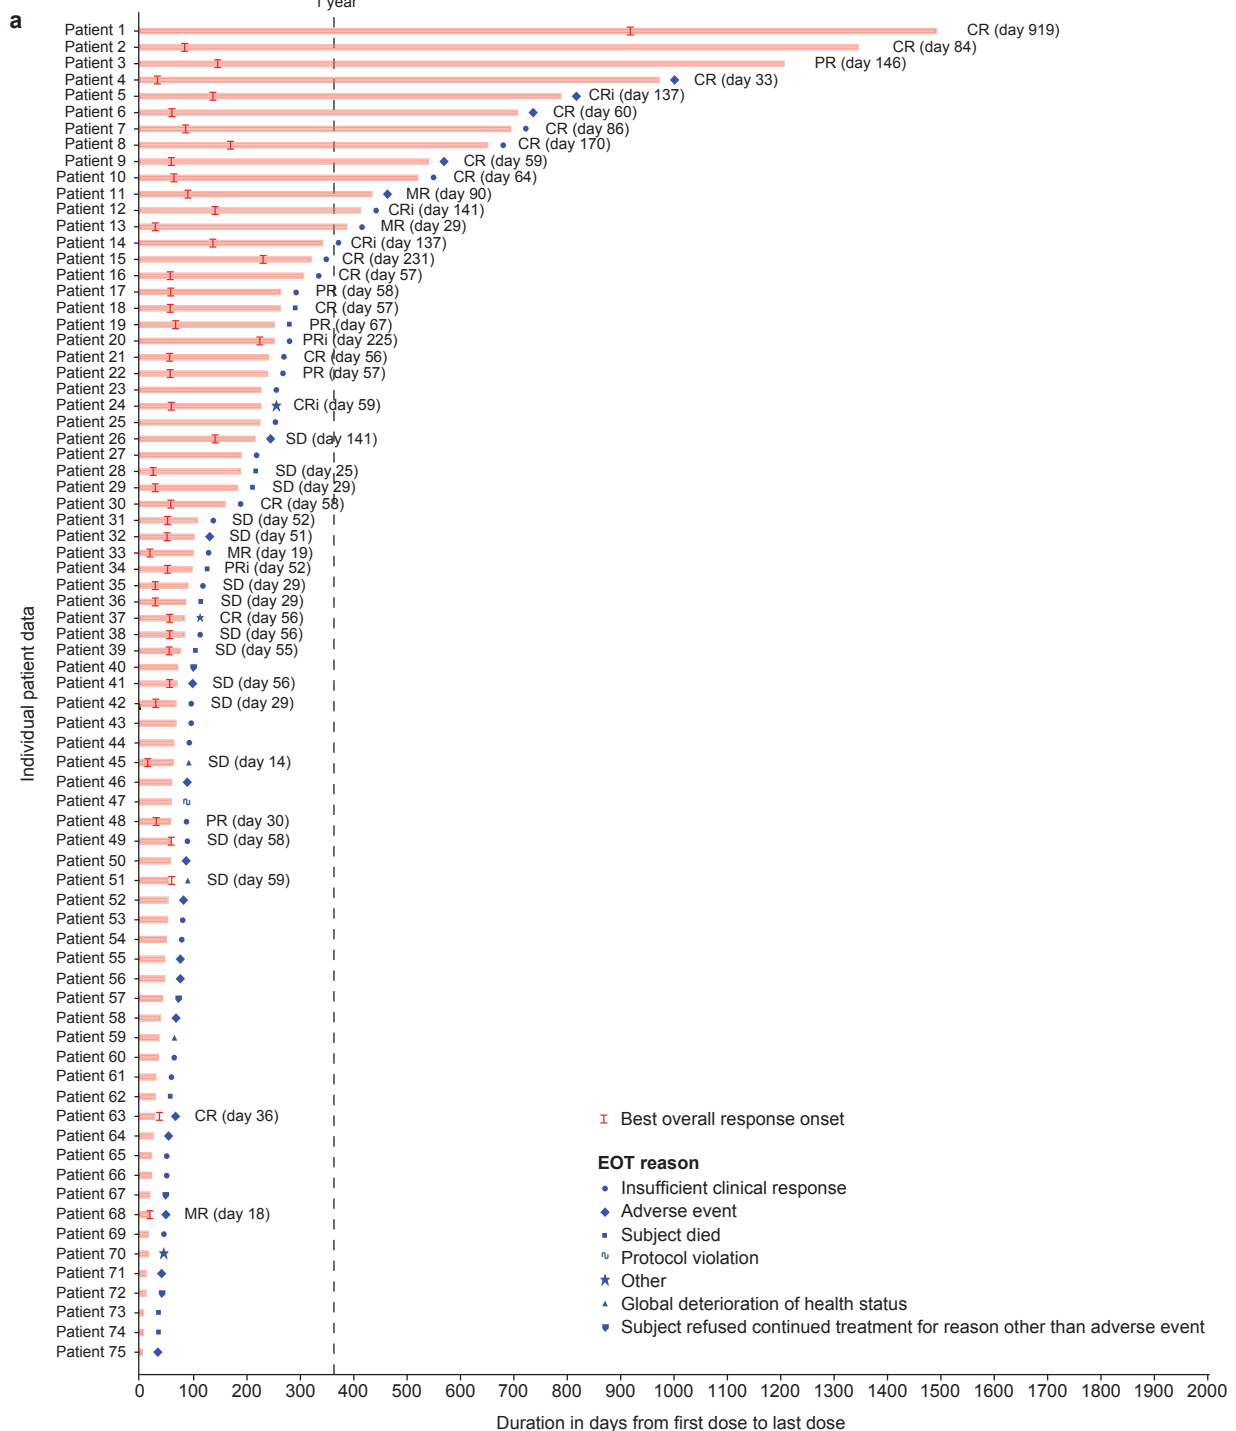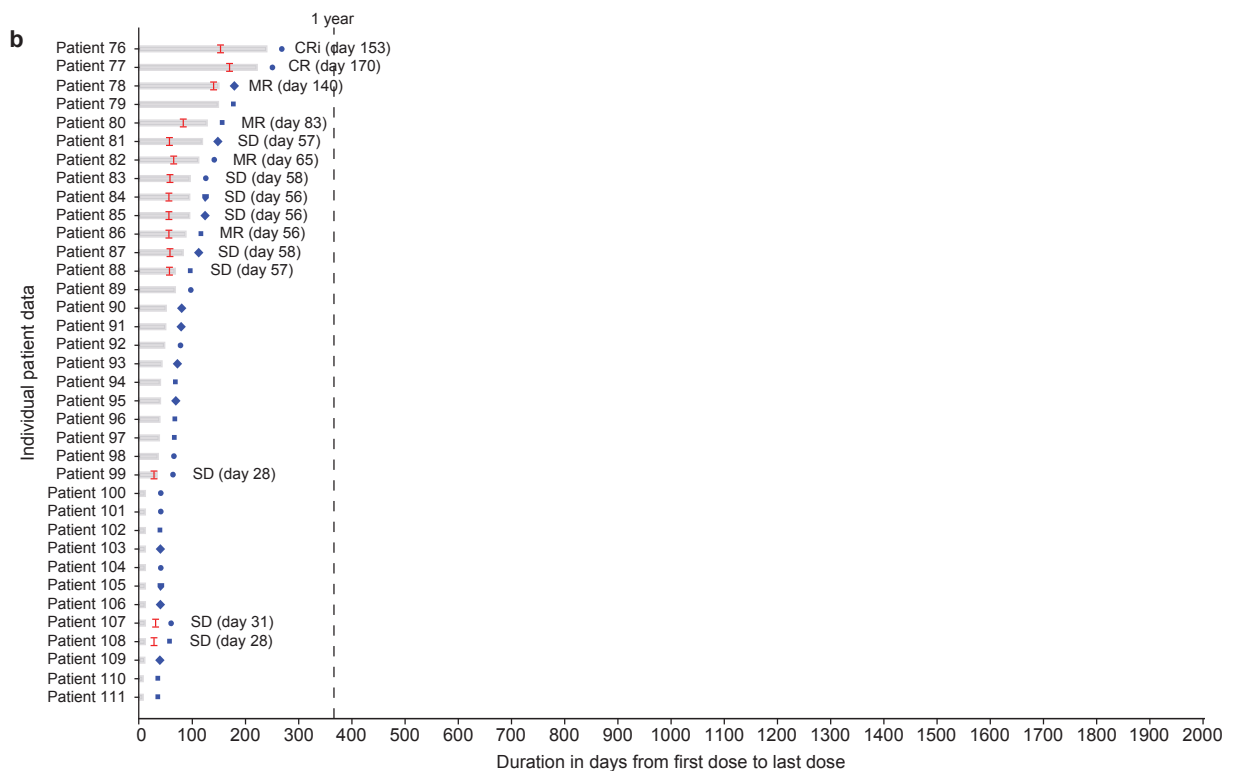

Supplement: 13045_2020_929_MOESM1_ESM.pdf [file 13045_2020_929_MOESM1_ESM.pdf]
