# Supplementary material for: Survival outcomes and clinical benefit in patients with acute myeloid leukemia treated with glasdegib and low-dose cytarabine according to response to therapy
Source: PubMed Central journal article supplement (PMC7362563; doi:10.1186/s13045-020-00929-8), 2020-07-14

**Fig S4.** Blood count recovery in patients who did not achieve CR. Percentage of patients with **a.** ANC **b.** hemoglobin **c.** platelets recovery during cycles one to ten. One threshold measurement was required; all patients were included regardless of their BL levels but each cycle only included remaining patients at risk in that cycle. Analysis set,  $N$  = number of patients with ANC results in the cycle; patients,  $n$  = number of patients meeting recovery criteria in the cycle. Abbreviations: ANC, absolute neutrophil count; BL, baseline; CR, complete remission; LDAC, low-dose cytarabine.

**a**

ANC  $\geq$  1000/ $\mu$ l

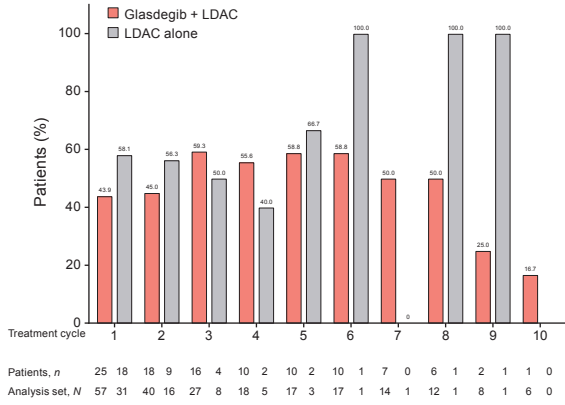

ANC  $\geq$  500/ $\mu$ l

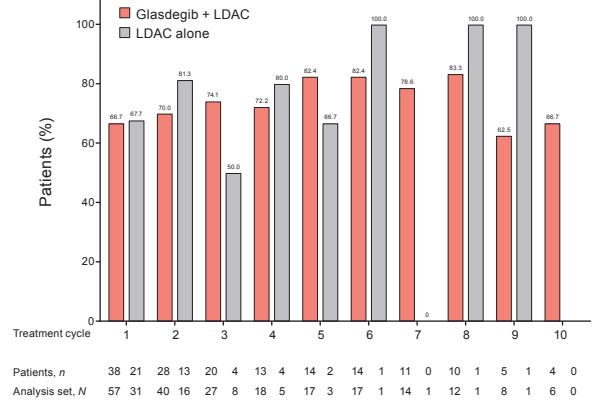

**b**

Hemoglobin  $\geq$  10 g/dl

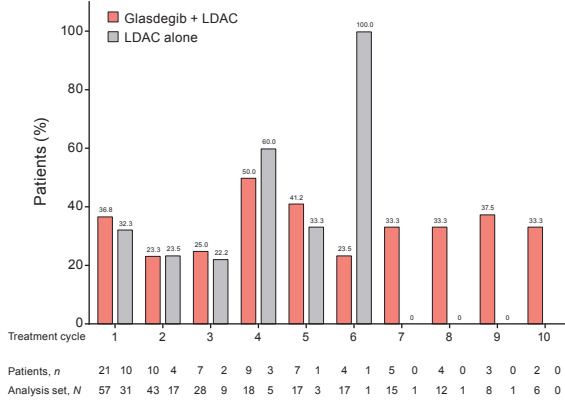

Hemoglobin  $\geq$  9 g/dl

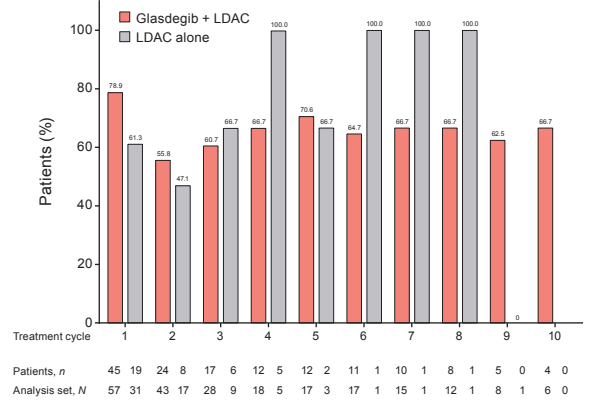

**c**

Platelets  $\geq$  100,000/ $\mu$ l

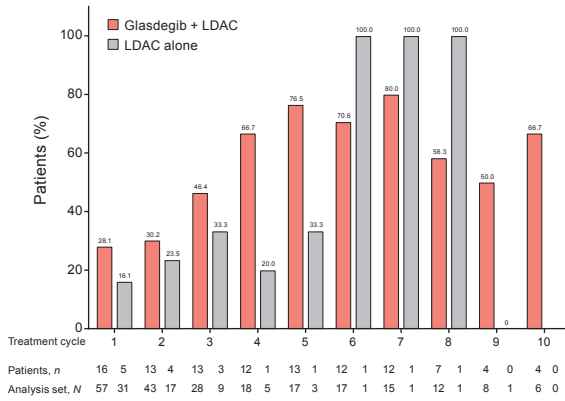

Platelets  $\geq$  50,000/ $\mu$ l

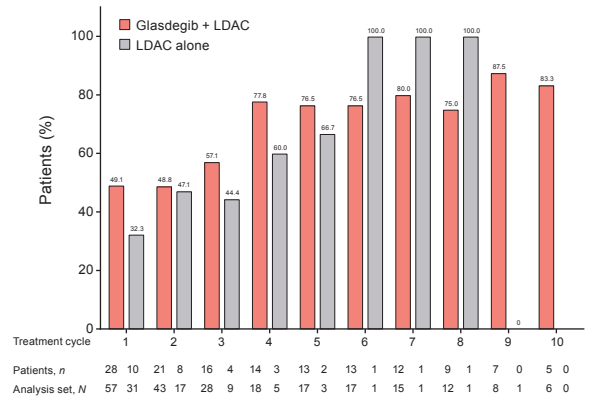

Supplement: 13045_2020_929_MOESM4_ESM.pdf [file 13045_2020_929_MOESM4_ESM.pdf]
