# Supplementary material for: Survival outcomes and clinical benefit in patients with acute myeloid leukemia treated with glasdegib and low-dose cytarabine according to response to therapy
Source: PubMed Central journal article supplement (PMC7362563; doi:10.1186/s13045-020-00929-8), 2020-07-14
Supplement: 13045_2020_929_MOESM5_ESM.pdf [file 13045_2020_929_MOESM5_ESM.pdf]

**Table S1.** Patient disposition

|                                                         | Achieved CR      |            | Did not achieve CR |            |
|---------------------------------------------------------|------------------|------------|--------------------|------------|
|                                                         | <i>n</i> = 16    |            | <i>n</i> = 100     |            |
|                                                         | Glasdegib + LDAC | LDAC alone | Glasdegib + LDAC   | LDAC alone |
| Assigned to study treatment, <i>n</i>                   | 15               | 1          | 63                 | 37         |
| Treated, <i>n</i>                                       | 15               | 1          | 60                 | 35         |
| Treatment discontinued, <i>n</i> (%)                    | 13 (86.7)        | 1 (100)    | 59 (98.3)          | 35 (100)   |
| Treatment ongoing at date of data cut-off, <i>n</i> (%) | 2 (13.3)         | 0          | 1 (1.7)            | 0          |
| Study discontinued, <i>n</i> (%)                        | 12 (80.0)        | 1 (100)    | 61 (96.8)          | 36 (97.3)  |
| Study ongoing at date of data cut-off, <i>n</i> (%)     | 3 (20.0)         | 0          | 2 (3.2)            | 1 (2.7)    |

CR, complete remission; LDAC, low-dose cytarabine
