# Supplementary material for: Survival outcomes and clinical benefit in patients with acute myeloid leukemia treated with glasdegib and low-dose cytarabine according to response to therapy
Source: PubMed Central journal article supplement (PMC7362563; doi:10.1186/s13045-020-00929-8), 2020-07-14
Supplement: 13045_2020_929_MOESM6_ESM.pdf [file 13045_2020_929_MOESM6_ESM.pdf]

**Table S2.** Treatment-emergent all-causality adverse events\* occurring during first 90 days and after 90 days of therapy

| MedDRA preferred term, <i>n</i> (%) | Achieved CR      |           |              |           | Did not achieve CR |           |               |           |
|-------------------------------------|------------------|-----------|--------------|-----------|--------------------|-----------|---------------|-----------|
|                                     | Glasdegib + LDAC |           | LDAC alone   |           | Glasdegib + LDAC   |           | LDAC alone    |           |
|                                     | <i>n</i> = 15    |           | <i>n</i> = 1 |           | <i>n</i> = 60      |           | <i>n</i> = 35 |           |
| During the first 90 days            | Any grade        | Grade 3/4 | Any grade    | Grade 3/4 | Any grade          | Grade 3/4 | Any grade     | Grade 3/4 |
| Anemia                              | 8 (53.3)         | 7 (46.7)  | 0            | 0         | 25 (41.7)          | 24 (40.0) | 15 (42.9)     | 13 (37.1) |
| Nausea                              | 5 (33.3)         | 0         | 0            | 0         | 17 (28.3)          | 1 (1.7)   | 4 (11.4)      | 1 (2.9)   |
| Febrile neutropenia                 | 6 (40.0)         | 6 (40.0)  | 0            | 0         | 17 (28.3)          | 17 (28.3) | 8 (22.9)      | 8 (22.9)  |
| Decreased appetite                  | 3 (20.0)         | 0         | 0            | 0         | 12 (20.0)          | 0         | 3 (8.6)       | 1 (2.9)   |
| Thrombocytopenia                    | 6 (40.0)         | 6 (40.0)  | 0            | 0         | 17 (28.3)          | 17 (28.3) | 9 (25.7)      | 8 (22.9)  |
| Diarrhea                            | 6 (40.0)         | 0         | 0            | 0         | 7 (11.7)           | 1 (1.7)   | 9 (25.7)      | 0         |
| Fatigue                             | 5 (33.3)         | 1 (6.7)   | 0            | 0         | 14 (23.3)          | 6 (10.0)  | 6 (17.1)      | 2 (5.7)   |
| Pneumonia                           | 2 (13.3)         | 1 (6.7)   | 0            | 0         | 12 (20.0)          | 7 (11.7)  | 9 (25.7)      | 7 (20.0)  |
| Pyrexia                             | 3 (20.0)         | 1 (6.7)   | 0            | 0         | 12 (20.0)          | 0         | 8 (22.9)      | 1 (2.9)   |
| Constipation                        | 3 (20.0)         | 0         | 1 (100)      | 0         | 12 (20.0)          | 1 (1.7)   | 4 (11.4)      | 0         |

|                  |          |   |   |   |           |         |          |         |
|------------------|----------|---|---|---|-----------|---------|----------|---------|
| Edema peripheral | 5 (33.3) | 0 | 0 | 0 | 12 (20.0) | 0       | 7 (20.0) | 1 (2.9) |
| Dysgeusia        | 7 (46.7) | 0 | 0 | 0 | 8 (13.3)  | 0       | 1 (2.9)  | 0       |
| Vomiting         | 4 (26.7) | 0 | 0 | 0 | 11 (18.3) | 2 (3.3) | 3 (8.6)  | 1 (2.9) |
| Cough            | 2 (13.3) | 0 | 0 | 0 | 10 (16.7) | 0       | 5 (14.3) | 1 (2.9) |
| Dizziness        | 4 (26.7) | 0 | 0 | 0 | 9 (15.0)  | 1 (1.7) | 3 (8.6)  | 0       |
| Dyspnea          | 1 (6.7)  | 0 | 0 | 0 | 12 (20.0) | 4 (6.7) | 9 (25.7) | 2 (5.7) |
| Muscle spasm     | 6 (40.0) | 0 | 0 | 0 | 5 (8.3)   | 0       | 2 (5.7)  | 0       |
| Weight decreased | 4 (26.7) | 0 | 0 | 0 | 7 (11.7)  | 0       | 1 (2.9)  | 0       |

|                     | Glasdegib + LDAC |           | LDAC alone   |           | Glasdegib + LDAC |           | LDAC alone    |           |
|---------------------|------------------|-----------|--------------|-----------|------------------|-----------|---------------|-----------|
|                     | <i>n</i> = 14    |           | <i>n</i> = 1 |           | <i>n</i> = 29    |           | <i>n</i> = 13 |           |
| After 90 days       | Any grade        | Grade 3/4 | Any grade    | Grade 3/4 | Any grade        | Grade 3/4 | Any grade     | Grade 3/4 |
| Anemia              | 5 (35.7)         | 3 (21.4)  | 0            | 0         | 8 (27.6)         | 7 (24.1)  | 3 (23.1)      | 3 (23.1)  |
| Nausea              | 4 (28.6)         | 0         | 0            | 0         | 5 (17.2)         | 1 (3.4)   | 0             | 0         |
| Febrile neutropenia | 0                | 0         | 0            | 0         | 4 (13.8)         | 4 (13.8)  | 1 (7.7)       | 1 (7.7)   |
| Decreased appetite  | 5 (35.7)         | 1 (7.1)   | 0            | 0         | 8 (27.6)         | 2 (6.9)   | 3 (23.1)      | 2 (15.4)  |
| Thrombocytopenia    | 2 (14.3)         | 1 (7.1)   | 0            | 0         | 8 (27.6)         | 8 (27.6)  | 2 (15.4)      | 2 (15.4)  |

|                  |          |          |   |   |          |         |          |         |
|------------------|----------|----------|---|---|----------|---------|----------|---------|
| Diarrhea         | 9 (64.3) | 1 (7.1)  | 0 | 0 | 5 (17.2) | 2 (6.9) | 1 (7.7)  | 1 (7.7) |
| Fatigue          | 5 (35.7) | 2 (14.3) | 0 | 0 | 2 (6.9)  | 1 (3.4) | 2 (15.4) | 0       |
| Pneumonia        | 3 (21.4) | 1 (7.1)  | 0 | 0 | 5 (17.2) | 2 (6.9) | 3 (23.1) | 1 (7.7) |
| Pyrexia          | 5 (35.7) | 1 (7.1)  | 0 | 0 | 5 (17.2) | 0       | 1 (7.7)  | 1 (7.7) |
| Constipation     | 1 (7.1)  | 0        | 0 | 0 | 4 (13.8) | 0       | 1 (7.7)  | 0       |
| Edema peripheral | 4 (28.6) | 0        | 0 | 0 | 1 (3.4)  | 1 (3.4) | 0        | 0       |
| Dysgeusia        | 4 (28.6) | 0        | 0 | 0 | 2 (6.9)  | 0       | 0        | 0       |
| Vomiting         | 2 (14.3) | 0        | 0 | 0 | 2 (6.9)  | 0       | 0        | 0       |
| Cough            | 3 (21.4) | 0        | 0 | 0 | 2 (6.9)  | 0       | 1 (7.7)  | 0       |
| Dizziness        | 3 (21.4) | 0        | 0 | 0 | 3 (10.3) | 0       | 0        | 0       |
| Dyspnea          | 2 (14.3) | 0        | 0 | 0 | 2 (6.9)  | 0       | 2 (15.4) | 0       |
| Muscle spasm     | 7 (50.0) | 3 (21.4) | 0 | 0 | 3 (10.3) | 1 (3.4) | 0        | 0       |
| Weight decreased | 5 (35.7) | 2 (14.3) | 0 | 0 | 1 (3.4)  | 0       | 0        | 0       |

---

CR, complete remission; LDAC, low-dose cytarabine; MedDRA, Medical Dictionary for Regulatory Activities; TEAE, treatment-emergent adverse event

\*Reported for TEAEs occurring in  $\geq 20\%$  of patients (receiving glasdegib + LDAC or LDAC alone) in the BRIGHT AML 1003 study

(glasdegib + LDAC:  $n = 75$ ; LDAC alone:  $n = 36$ )
