# Supplementary material for: Survival outcomes and clinical benefit in patients with acute myeloid leukemia treated with glasdegib and low-dose cytarabine according to response to therapy
Source: Springer Nature journal article supplement (doi:10.1186/s13045-020-00929-8), 2020-07-14

**Fig. S2.** Kaplan–Meier plots of OS. **a** In patients who achieved CR or CRi. **b** In patients who did not achieve CR or CRi. Abbreviations: CI, confidence interval; CR, complete remission; CRi, CR with incomplete hematologic response; LDAC, low-dose cytarabine; OS, overall survival

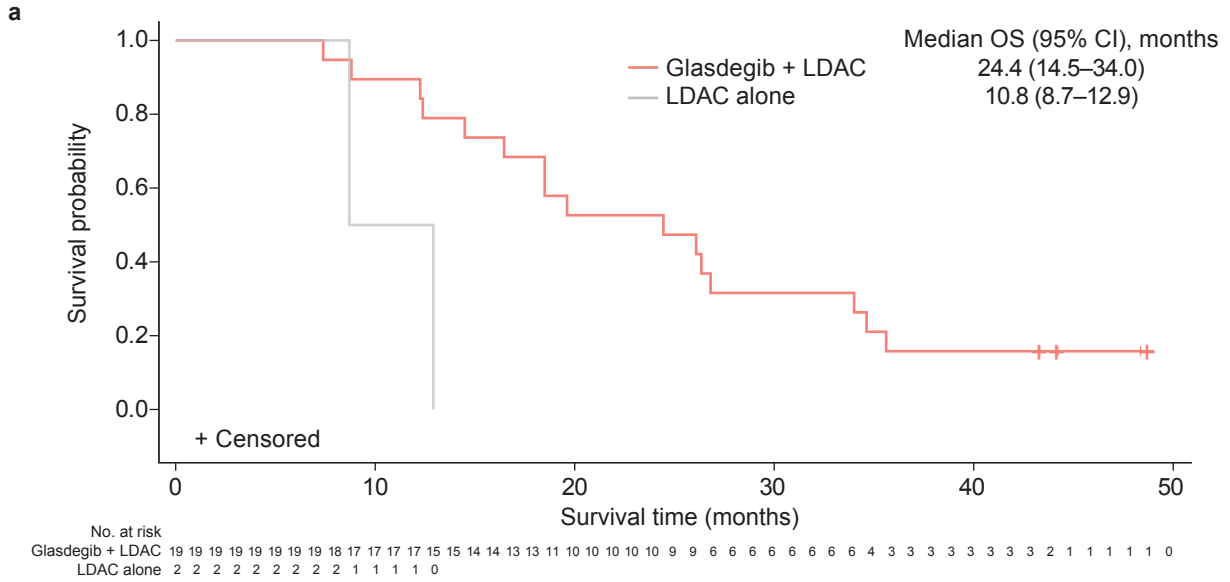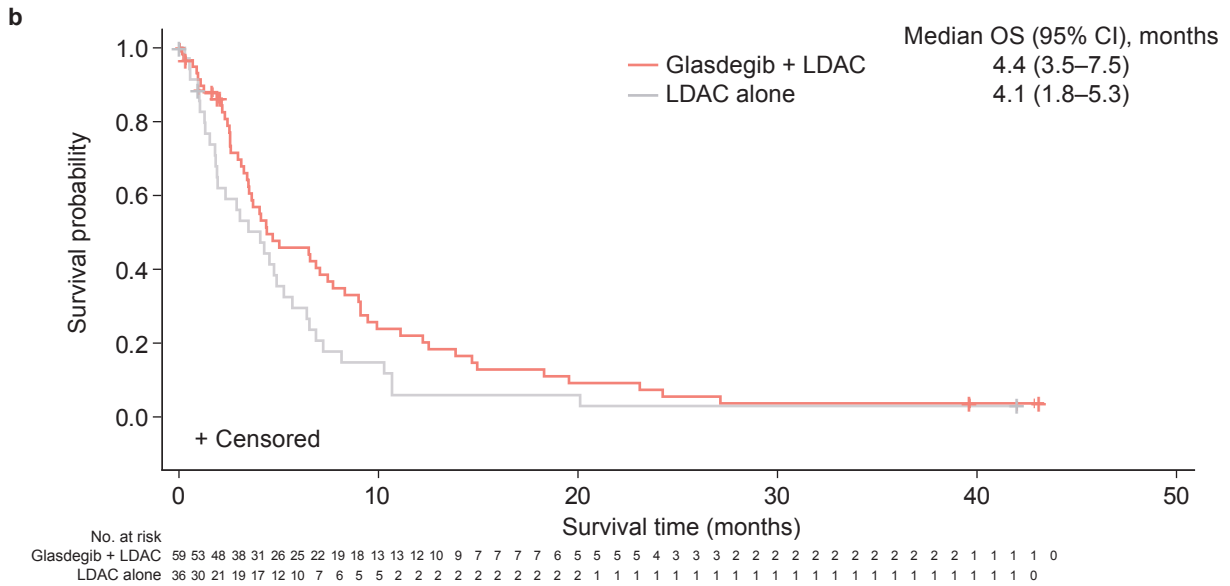

Supplement: MOESM2 [file 18182370]
