# Supplementary material for: Survival outcomes and clinical benefit in patients with acute myeloid leukemia treated with glasdegib and low-dose cytarabine according to response to therapy
Source: Springer Nature journal article supplement (doi:10.1186/s13045-020-00929-8), 2020-07-14
Supplement: MOESM3 [file 18182370]

**Fig. S3.** Kaplan–Meier plots of OS with censoring for systemic follow-up therapies. **a** In patients who achieved CR. **b** In patients who did not achieve CR. Abbreviations: CI, confidence interval; CR, complete remission; LDAC, low-dose cytarabine; N/E, not evaluable; OS, overall survival
